# Supplementary material
Source: PubMed Central journal article supplement (PMC5695034)
Supplement: NIHMS842405-supplement-1.pdf [file NIHMS842405-supplement-1.pdf]

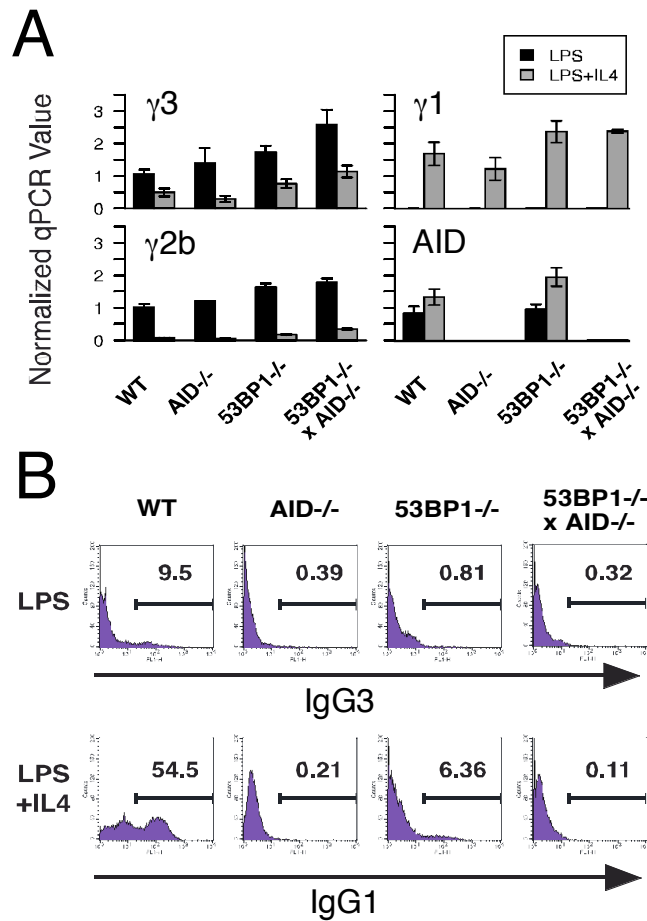

**Supplementary Figure 1. 53BP1 deficiency leads to intact GLT expression and diminished CSR (Related to Figures 1,2).** CD43- resting B cells were stimulated with LPS or LPS+IL4 for 48 hours **(A)** or 5 days **(B)**. **A**  $\gamma 3$ ,  $\gamma 2b$  and  $\gamma 1$  GLTs and AID expression were analyzed by quantitative (q) RT-PCR from B cells stimulated as indicated and signals were normalized to the *Hprt* gene transcript as previously described (1). **B** Live B cells were gated and assessed by FACS analysis with FITC labeled anti-IgG3 or anti-IgG1. Data from representative WT, AID<sup>-/-</sup>, 53BP1<sup>-/-</sup> and 53BP1<sup>-/-</sup>xAID<sup>-/-</sup> are shown.
