# Supplementary material
Source: PubMed Central journal article supplement (PMC5695034)
Supplement: NIHMS842405-supplement-2.pdf [file NIHMS842405-supplement-2.pdf]

**Supplementary Table I.** Primer and Probe Sequences Used in the Quantitative 3C assay.

| Probe <sup>1</sup> | Primer <sup>2,3,4</sup> | Sequence                                 | References |
|--------------------|-------------------------|------------------------------------------|------------|
| Amy                | mb1F                    | 5' CCACGCACTAGAGAGAGACTCAA 3'            | (23)       |
|                    | mb1R                    | 5' CCGCCTCACTTCCTGTTTCAGCCG 3'           | (23)       |
| A (E $\mu$ )       | T.AmyF                  | 5' TTGAATATGTACCGAGTACACATGGATGGTGCAT 3' | (26)       |
|                    | T.AmyR                  | 5' GAGATCTTACGTAGGCACTTAGTGGTATAA 3'     | (26)       |
| H (hs3b,4)         | T.A-A*                  | 5' GCTTCCATGATACTCTATGTTCTTCCT 3'        | (26)       |
|                    | T.H-H*                  | 5' TGGCTTACCATTTGCGGTGCCTGGTTT 3'        | (23)       |
|                    | T.A                     | 5' TCCACACAAAGACTCTGGACCTCT 3'           | (23)       |
|                    | T.B                     | 5' TGACTCATCCACATCACCTTGCCTGTG 3'        | (26)       |
|                    | T.C                     | 5' CTCCCACCAGCCAAGACAAT 3'               | (23)       |
|                    | T.D                     | 5' GAAACCAGGCACCGCAAATG 3'               | (23)       |
|                    | T.E                     | 5' AGTAGATAGGACAGATGGAGCAGTTACA 3'       | (23)       |
|                    | T.F                     | 5' GTGATAATGAACTGAATCCCACATGTAC 3'       | (23)       |
|                    | T.G                     | 5' AGTACCCAGCATGTTACATC 3'               | (23)       |
|                    | T.G'                    | 5' CTAATCTGGGATGAGGTGGACTGA 3'           | This study |
|                    | T.H                     | 5' AGGACCAAGGTTACAGCCA 3'                | (23)       |
|                    | T.I                     | 5' GCTGACTTACAGCCCCACATG 3'              | This study |
|                    | T.J                     | 5' CCACATGGCAGCTCTCTACTGTAA 3'           | This study |
|                    | T.Q                     | 5' GCCCCTAAGACCCTACTCTGCTA 3'            | (23)       |
|                    | T.I                     | 5' ACTATCTGAGCAGTCTTATTTTTACAG 3'        | This study |
|                    | T.J                     | 5' CACCTCTCAGACCTGCTTCCTT 3'             | This study |
|                    | T.Q                     | 5' TGGAGATTTACCTGGATCCCTCT 3'            | This study |

1 3C probes specific for unique HindIII fragments are denoted by a capital letter referring to the 3C fragments shown in Figure 1. Amy indicates a probe located in the *Amylase1* gene. The probes with their associated anchor primers are designed to be used in combination with any other 3C primers.

2 F and R indicate forward and reverse primers, respectively.

3 Primers marked with the asterisk (\*) are used in combination with anchor probes.

4 3C assay primers specific for each HindIII fragment are denoted by a capital letter referring to the 3C fragments shown in Figures 1 and 2.
